# Supplementary material
Source: HighWire-hosted journal article supplement (https://www.annfammed.org/highwire/filestream/7956/field_highwire_adjunct_files/0/Maarsingh_Supp_Apps.pdf)
Supplement: Maarsingh_Supp_Apps.pdf [file Maarsingh_Supp_Apps.pdf]

**Online Supplementary Material**

Maarsingh OR, Dros J, Schellevis FG, et al. Causes of persistent dizziness in elderly patients in primary care: a diagnostic study based on panel diagnosis. *Ann Fam Med.* 2010;8(3):196-205.

<http://www.annfammed.org/cgi/content/full/8/3/196/DC1>

**Supplemental Appendix 1. Search Strategy Used in Electronic Databases for Identifying Dizzy Patients Family Physicians Had Failed to Invite (15 Search Terms and 3 ICPC Codes)**

| Terms and Codes     | Symptom in Dutch    | English Translation           | Dizziness Subtype   | Type of Sensation                                                                                                                                                   |
|---------------------|---------------------|-------------------------------|---------------------|---------------------------------------------------------------------------------------------------------------------------------------------------------------------|
| <b>Search terms</b> |                     |                               |                     |                                                                                                                                                                     |
| 1. draai*           | -draaiurig          | -giddy/rotational sensation   | I. Vertigo          | A feeling that one or one's surroundings are moving                                                                                                                 |
| 2. vertig*          | -vertigo            | -vertigo                      |                     |                                                                                                                                                                     |
| 3. zweve*           | -zweverig           | -giddy                        |                     |                                                                                                                                                                     |
| 4. collab*          | -collaberen         | -collapsing                   | II. Presyncope      | A lightheaded, faint feeling, as though one were about to pass out                                                                                                  |
| 5. collap*          | -collaps            | -collapse                     |                     |                                                                                                                                                                     |
| 6. flauw*           | -flauwte            | -faint feeling                |                     |                                                                                                                                                                     |
| 7. licht in         | -licht in het hoofd | -lightheadedness              |                     |                                                                                                                                                                     |
| 8. onwel*           | -onwelwording       | -becoming unwell              |                     |                                                                                                                                                                     |
| 9. zwart voor       | -zwart voor de ogen | -everything turning black     |                     |                                                                                                                                                                     |
| 10. evenwicht*      | -evenwichtsstoornis | -loss of equilibrium          | III. Disequilibrium | A sense of unsteadiness that is (1) primarily felt in the lower extremities, (2) most prominent when standing or walking, and (3) relieved by sitting or lying down |
| 11. onvast*         | -onvast (ter been)  | -instability                  |                     |                                                                                                                                                                     |
| 12. valnei*         | -valneiging         | -tendency to fall             |                     |                                                                                                                                                                     |
| 13. wankel*         | -wankel (ter been)  | -to be unsteady on one's legs |                     |                                                                                                                                                                     |
| 14. dizz*           | -dizzy              | -dizzy                        | IV. No subtype      | Dizziness not specified                                                                                                                                             |
| 15. duizel*         | -duizeligheid       | -dizziness                    |                     |                                                                                                                                                                     |

**ICPC codes**

1. A06 Fainting/syncope
2. H82 Vertiginous syndrome
3. N17 Vertigo/dizziness

ICPC = *International Classification of Primary Care.*

\*Truncated search term.

## Supplemental Appendix 2. Diagnostic Criteria During the Evaluation of Dizzy Elderly Patients

| System                                      | Diagnostic Criteria                                                                                                                                                                                                       |
|---------------------------------------------|---------------------------------------------------------------------------------------------------------------------------------------------------------------------------------------------------------------------------|
| Cardiovascular system                       |                                                                                                                                                                                                                           |
| Bradycardia                                 | < 60 beats per minute, and < 50 beats per minute when taking $\beta$ -blockers                                                                                                                                            |
| Tachycardia                                 | > 100 beats per minute                                                                                                                                                                                                    |
| Elevated blood pressure                     | Systolic blood pressure 160 mm Hg after 5 min in supine position                                                                                                                                                          |
| Positive orthostatic hypotension test       | A 20-mm Hg decrease in systolic blood pressure, or a systolic blood pressure below 90 mm Hg, measured at any of the given time periods (after 1, 2, 3, 4, or 5 minutes in standing position)                              |
| Explanatory abnormalities during ECG or CER | Bradycardia, tachycardia, atrial fibrillation/flutter, supraventricular tachycardia, ventricular tachycardia, ventricular fibrillation, torsades de pointes, brady-tachy syndrome, or a 3rd-degree atrioventricular block |
| Locomotor system                            |                                                                                                                                                                                                                           |
| Abnormal tandem gait                        | A tandem gait score of 40 seconds or more <sup>a</sup>                                                                                                                                                                    |
| Abnormal timed up-and-go test               | A timed up-and-go score of 20 seconds or more                                                                                                                                                                             |
| Neurological system                         |                                                                                                                                                                                                                           |
| Abnormal patellar tendon reflex             | Clonus, or absent reflex                                                                                                                                                                                                  |
| Abnormal Achilles tendon reflex             | Clonus, or absent reflex                                                                                                                                                                                                  |
| Abnormal plantar responses                  | Sign of Babinski                                                                                                                                                                                                          |
| Peripheral neuropathy                       | The inability to perceive a monofilament (Semmes-Weinstein monofilament test) for at least 2 of 8 anatomical sites                                                                                                        |
| Vestibular system                           |                                                                                                                                                                                                                           |
| Abnormal otoscopy                           | Otitis media, otitis externa, perforated tympanic membrane, or deformities tympanic membrane caused by trauma or surgery                                                                                                  |
| Positive Dix-Hallpike maneuver              | Vertigo associated with a mixed torsional and vertical nystagmus, a decline in the provoked vertigo and nystagmus within 30 seconds, and fatigability if the test was repeated                                            |
| Abnormal audiometry                         | A Fletcher index of at least 35 dB for both ears <sup>b</sup>                                                                                                                                                             |
| Laboratory tests                            |                                                                                                                                                                                                                           |
| Moderately severe anemia                    | Hemoglobin levels between 5.0-6.0 mmol/L (8.1-9.7 g/dL) in women, or between 5.0-6.5 mmol/L (8.1-10.5 g/dL) in men                                                                                                        |
| Severe anemia                               | Hemoglobin levels of < 5.0 mmol/L (< 8.1 g/dL)                                                                                                                                                                            |
| Hyperglycemia                               | A nonfasting blood glucose of > 11.0 mmol/L (> 200 mg/dL)                                                                                                                                                                 |
| Hypoglycemia                                | A nonfasting blood glucose of < 3.0 mmol/L (< 55 mg/dL)                                                                                                                                                                   |
| Other                                       |                                                                                                                                                                                                                           |
| Impaired vision                             | Corrected visual acuity of ODS $\leq 0.5$                                                                                                                                                                                 |

CER = patient-activated continuous-loop event recording; ECG = electrocardiography; ODS = oculi dexter et sinister.

<sup>a</sup> Tandem gait score: the time in seconds added to the number of mistakes, multiplied by 3.

<sup>b</sup> Fletcher index: the average hearing loss in decibels for 1, 2, and 4 kHz.

### Supplemental Appendix 3. Score Form Used by the Reviewers

#### Page 1. Test results of the patient

|                                                                                                                                           |                                                                                                                                                                         |
|-------------------------------------------------------------------------------------------------------------------------------------------|-------------------------------------------------------------------------------------------------------------------------------------------------------------------------|
| <b>History</b>                                                                                                                            |                                                                                                                                                                         |
| Patient number                                                                                                                            | [...]                                                                                                                                                                   |
| Age/sex                                                                                                                                   | [...] years / [...]                                                                                                                                                     |
| Medical history                                                                                                                           | [...]                                                                                                                                                                   |
| Medication use                                                                                                                            | [...]                                                                                                                                                                   |
| Onset, duration, and frequency of dizziness                                                                                               | [...]                                                                                                                                                                   |
| Description of dizziness                                                                                                                  | [...]                                                                                                                                                                   |
| Provoking circumstances                                                                                                                   | [...]                                                                                                                                                                   |
| Associated symptoms                                                                                                                       | [...]                                                                                                                                                                   |
| Hearing aid                                                                                                                               | [...]                                                                                                                                                                   |
| Seeing aid                                                                                                                                | [...]                                                                                                                                                                   |
| Walking aid                                                                                                                               | [...]                                                                                                                                                                   |
| <b>Physical examination, and additional tests</b>                                                                                         | [...]                                                                                                                                                                   |
| Dizziness Handicap Inventory Score                                                                                                        |                                                                                                                                                                         |
| Cardiovascular system                                                                                                                     |                                                                                                                                                                         |
| Pulse                                                                                                                                     | Frequency: [...]<br>Regularity: [...]                                                                                                                                   |
| Blood pressure, supine position                                                                                                           | [...] mm Hg                                                                                                                                                             |
| Orthostatic hypotension test                                                                                                              | Maximum decrease systolic blood pressure: [...] mm Hg<br>Maximum decrease diastolic blood pressure: [...] mm Hg<br>Reproduction of symptoms? [...]                      |
| Auscultation of the heart                                                                                                                 | Systolic/diastolic murmur? [...]<br>Radiation? [...]                                                                                                                    |
| Electrocardiogram                                                                                                                         | [...]                                                                                                                                                                   |
| Continuous loop event recording                                                                                                           | [...]                                                                                                                                                                   |
| Locomotor system                                                                                                                          |                                                                                                                                                                         |
| Orthopedic screening                                                                                                                      | Stability at rest: [...]<br>Stability during walking: [...]<br>Mobility hip(s): [...]<br>Mobility knee(s): [...]<br>Mobility ankle(s): [...]                            |
| Tandem gait                                                                                                                               | Number of mistakes: [...] / Time: [...] sec                                                                                                                             |
| Timed up-and-go test                                                                                                                      | [...] sec                                                                                                                                                               |
| Neurological system                                                                                                                       |                                                                                                                                                                         |
| Tendon reflexes                                                                                                                           | Patellar tendon reflex: Right [...] / Left [...]<br>Achilles tendon reflex: [Right [...] / Left [...]<br>Plantar responses: Right [...] / Left [...]                    |
| Semmes Weinstein monofilament test                                                                                                        | Right: [...] / Left: [...]                                                                                                                                              |
| Vestibular system                                                                                                                         |                                                                                                                                                                         |
| Otoscopy                                                                                                                                  | AD [...] / AS [...]                                                                                                                                                     |
| Dix-Hallpike maneuver                                                                                                                     | [...]                                                                                                                                                                   |
| Audiometry                                                                                                                                | Fletcher-index: AD [...] / AS [...]                                                                                                                                     |
| Corrected visual acuity                                                                                                                   | OD [...] / OS [...]                                                                                                                                                     |
| Psychiatric testing                                                                                                                       | Any somatoform disorder: [...]                                                                                                                                          |
| (PRIME-MD Patient Health Questionnaire)                                                                                                   | Major depressive disorder: [...]<br>Other depressive disorder: [...]<br>Panic disorder: [...]<br>Any eating disorder: [...]<br>Probable alcohol abuse/dependence: [...] |
| Laboratory tests                                                                                                                          | Hemoglobin: [...] g/dL<br>Nonfasting blood glucose: [...] mg/dL                                                                                                         |
| Additional comment physician                                                                                                              | [...]                                                                                                                                                                   |
| AD = auris dexter; AS = auris sinister; PRIME-MD = Primary Care Evaluation of Mental Disorders; OD = oculus dexter; OS = oculus sinister. |                                                                                                                                                                         |

**Page 2. Assessment of the reviewer**

**Code reviewer: [...]**

|                                                                                                                                                                                         |  |
|-----------------------------------------------------------------------------------------------------------------------------------------------------------------------------------------|--|
| I. Subgroup dizziness? <sup>1</sup><br>(mark with an <b>X</b> ; more than 1 choice is possible)                                                                                         |  |
| Vertigo<br>(a feeling that one or one's surroundings are moving)                                                                                                                        |  |
| Presyncope<br>(a lightheaded, faint feeling, as though one were about to pass out)                                                                                                      |  |
| Disequilibrium<br>(a sense of unsteadiness that is (1) primarily felt in the lower extremities, (2) most prominent when standing or walking, and (3) relieved by sitting or lying down) |  |
| Other dizziness<br>(feeling not covered by the above definitions)                                                                                                                       |  |

|                                                                                     |  |                                                                                                                                  |
|-------------------------------------------------------------------------------------|--|----------------------------------------------------------------------------------------------------------------------------------|
| II. Cause of dizziness?<br>(mark with an <b>X</b> ; more than 1 choice is possible) |  | If <b>X</b> : give an estimate of the relative contribution of this cause of dizziness (total sum of contributing causes = 100%) |
| 1. Adverse drug effect                                                              |  |                                                                                                                                  |
| 2. Cardiovascular disease (including cerebrovascular disease)                       |  |                                                                                                                                  |
| 3. Locomotor disease                                                                |  |                                                                                                                                  |
| 4. Metabolic or endocrine conditions                                                |  |                                                                                                                                  |
| 5. Neurological disease (excluding cerebrovascular disease)                         |  |                                                                                                                                  |
| 6. Psychiatric disease                                                              |  |                                                                                                                                  |
| 7. Peripheral vestibular disease                                                    |  |                                                                                                                                  |
| 8. Impaired vision                                                                  |  |                                                                                                                                  |
| 9. Other causes, namely: [...]                                                      |  |                                                                                                                                  |

|                                                 |
|-------------------------------------------------|
| III. Most probable cause of dizziness in words? |
| [...]                                           |

**Reference**

1. Sloane PD, Coeytaux RR, Beck RS, Dallara J. Dizziness: state of the science. *Ann Intern Med.* 2001;134(9pt 2):823-832.
